# Supplementary material for: Metformin-induced energy deficiency leads to the inhibition of lipogenesis in prostate cancer cells
Source: PubMed Central journal article supplement (PMC4558177; doi:10.18632/oncotarget.3404), 2015-03-10
Supplement: oncotarget-06-15652-s001.pdf [file oncotarget-06-15652-s001.pdf]

## SUPPLEMENTAL MATERIAL AND METHODS

### Luciferase assay

LNCaP were transfected using lipofectamin reagent (Invitrogen, Life technology) with 1  $\mu$ g of each of plasmid, according to the manufacturer's instructions. Forty-eight

hours after transfection, in presence or absence of 5 mM metformin, cells were lysed and luciferase activity was assessed.

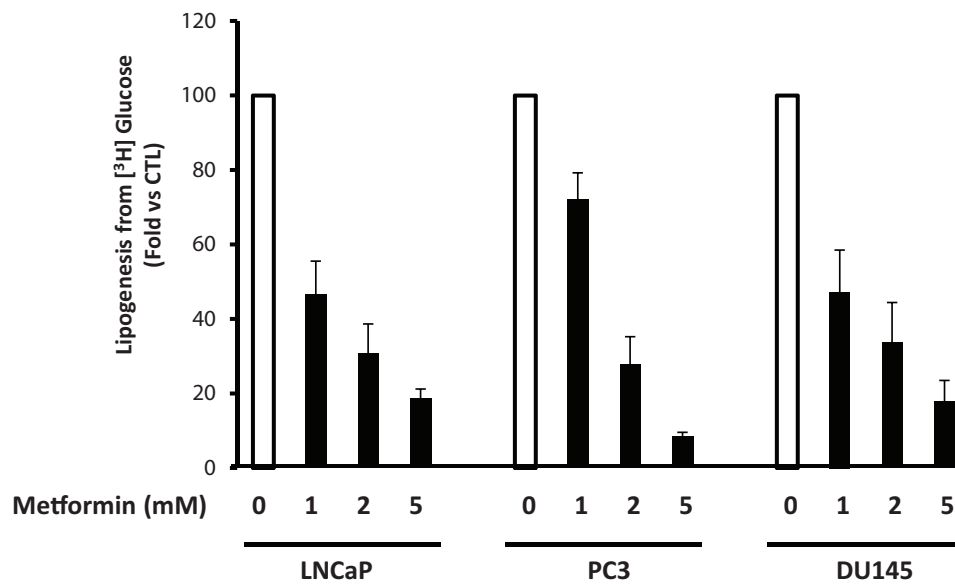

**Supplementary Figure S1: Metformin inhibits lipogenesis from <sup>3</sup>H Glucose.** Cells were treated with different concentrations of metformin (1 to 5 mM) for 24 h and the lipogenesis was performed as described in material and methods using 0.2  $\mu$ Ci/ml of [<sup>3</sup>H] Glucose.

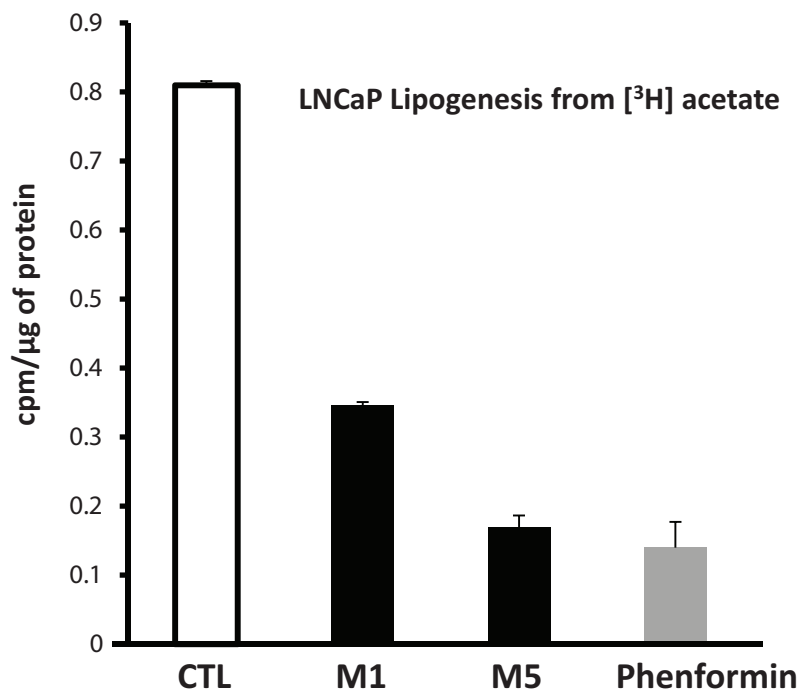

**Supplementary Figure S2: Phenformin inhibits lipogenesis.** The cells were treated with different concentrations of metformin 1 mM: M1, or 5 mM: M5 or 100 μM phenformin for 24 h and lipogenesis from [<sup>3</sup>H] Acetate was performed as described in Material and Methods.

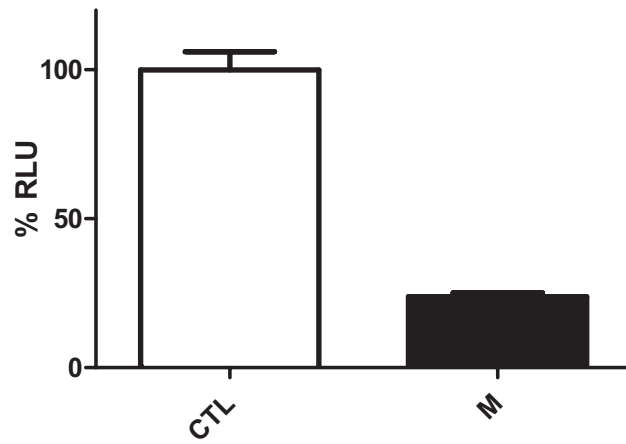

**Supplementary Figure S3: Metformin inhibits SREBP1c transcriptional activity.** LNCaP cells were transfected with a FASN promoter-Luc construct (-135pFAS-Luc), a kind gift of F. Foufelle. 24 h after the transfection cells were treated for 3 h with 5 mM metformin (M) and luciferase activity was measured.

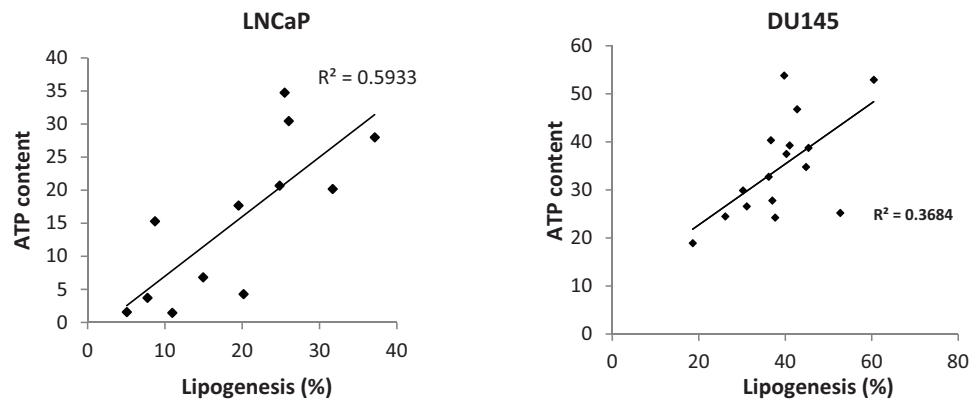

**Supplementary Figure S4: Rotenone decreases ATP content which correlates with a decrease of lipogenesis. (A, B)** LNCaP and DU145 were treated with increasing concentrations of rotenone (5, 10, 20 or 50  $\mu$ M), the graph represents the correlation between lipogenesis and ATP content.
